# Supplementary material for: An Improved Protocol for Comprehensive Etiological Characterization of Skin Warts and Determining Causative Human Papillomavirus Types in 128 Histologically Confirmed Common Warts
Source: MDPI journal article supplement (doi:10.3390/v14102266), 2022-10-15
Supplement: s1 [file s1]

## SUPPLEMENTARY MATERIALS

### An improved protocol for comprehensive etiological characterization of skin warts and determining causative human papillomavirus types in 128 histologically confirmed common warts

**Table S1:** Characteristics of 90 immunocompetent patients and 128 corresponding histologically confirmed common warts with the estimated cellular viral loads of human papillomavirus (HPV) types detected and causative HPV types determined.

| Sample no. | Patient no. | Patient sex | Patient age (year) | Wart location | Wart duration (month) | Wart diameter (mm) | HPV2 VL (copies/cell)                | HPV27 VL (copies/cell)               | HPV57 VL (copies/cell)               | HPV4 VL (copies/cell)                | HPV65 VL (copies/cell)               | Other HPV VL (copies/cell)                  | Causative HPV type <sup>a</sup> |
|------------|-------------|-------------|--------------------|---------------|-----------------------|--------------------|--------------------------------------|--------------------------------------|--------------------------------------|--------------------------------------|--------------------------------------|---------------------------------------------|---------------------------------|
| 1          | 1           | F           | 17                 | R hand        | 3                     | 8                  | -                                    | -                                    | <b><math>1.49 \times 10^4</math></b> | -                                    | -                                    | -                                           | HPV57                           |
| 2          | 2a          | M           | 31                 | head          | 4                     | 8                  | -                                    | -                                    | <b><math>2.88 \times 10^3</math></b> | -                                    | -                                    | -                                           | HPV57                           |
| 3          | 2b          | M           | 31                 | head          | 2                     | 3                  | -                                    | -                                    | <b><math>1.04 \times 10^3</math></b> | -                                    | -                                    | -                                           | HPV57                           |
| 4          | 3           | M           | 14                 | R leg         | 12                    | 15                 | -                                    | <b><math>1.16 \times 10^4</math></b> | -                                    | -                                    | -                                    | -                                           | HPV27                           |
| 5          | 4           | F           | 14                 | L leg         | 12                    | 13                 | -                                    | <b><math>1.78 \times 10^3</math></b> | -                                    | -                                    | -                                    | -                                           | HPV27                           |
| 6          | 5           | M           | 38                 | R hand        | 36                    | 6                  | -                                    | -                                    | <b><math>1.59 \times 10^4</math></b> | -                                    | -                                    | -                                           | HPV57                           |
| 7          | 6           | M           | 16                 | head          | 12                    | 3                  | -                                    | -                                    | <b><math>7.31 \times 10^2</math></b> | -                                    | -                                    | -                                           | HPV57                           |
| 8          | 7           | F           | 16                 | L hand        | 24                    | 10                 | -                                    | <b><math>1.78 \times 10^5</math></b> | -                                    | -                                    | -                                    | -                                           | HPV27                           |
| 9          | 8           | M           | 15                 | R hand        | 12                    | 7                  | <b><math>1.24 \times 10^4</math></b> | -                                    | -                                    | -                                    | -                                    | HPV1: $8.92 \times 10^{-4}$                 | HPV2                            |
| 10         | 9           | F           | 33                 | L hand        | 6                     | 5                  | <b><math>1.44 \times 10^4</math></b> | -                                    | -                                    | -                                    | -                                    | -                                           | HPV2                            |
| 11         | 10          | M           | 23                 | R hand        | 12                    | 4                  | -                                    | <b><math>1.52 \times 10^4</math></b> | -                                    | -                                    | -                                    | -                                           | HPV27                           |
| 12         | 11          | M           | 49                 | L arm         | 24                    | 15                 | -                                    | -                                    | -                                    | -                                    | -                                    | HPV10: <b><math>6.07 \times 10^3</math></b> | HPV10                           |
| 13         | 12          | F           | 25                 | R hand        | 60                    | 4                  | <b><math>5.35 \times 10^4</math></b> | -                                    | -                                    | -                                    | $1.25 \times 10^{-2}$                | -                                           | HPV2                            |
| 14         | 13          | F           | 29                 | R hand        | 24                    | 8                  | -                                    | -                                    | <b><math>1.16 \times 10^4</math></b> | -                                    | -                                    | -                                           | HPV57                           |
| 15         | 14a         | M           | 22                 | R hand        | 12                    | 2                  | $2.01 \times 10^{-3}$                | -                                    | -                                    | <b><math>1.68 \times 10^2</math></b> | -                                    | -                                           | HPV4                            |
| 16         | 14b         | M           | 22                 | R hand        | 1                     | 8                  | <b><math>1.99 \times 10^4</math></b> | -                                    | -                                    | $6.40 \times 10^{-4}$                | -                                    | -                                           | HPV2                            |
| 17         | 15          | M           | 22                 | L leg         | 6                     | 9                  | <b><math>3.63 \times 10^4</math></b> | -                                    | -                                    | -                                    | -                                    | -                                           | HPV2                            |
| 18         | 16a         | F           | 20                 | L hand        | 24                    | 10                 | -                                    | -                                    | -                                    | <b><math>5.49 \times 10^5</math></b> | -                                    | -                                           | HPV4                            |
| 19         | 16b         | F           | 20                 | L hand        | 24                    | 4                  | -                                    | -                                    | -                                    | <b><math>2.75 \times 10^4</math></b> | -                                    | -                                           | HPV4                            |
| 20         | 17          | F           | 30                 | R hand        | 36                    | 4                  | -                                    | -                                    | -                                    | -                                    | -                                    | HPV7: <b><math>1.75 \times 10^1</math></b>  | HPV7                            |
| 21         | 18a         | F           | 78                 | R hand        | 2                     | 8                  | -                                    | -                                    | -                                    | -                                    | <b><math>1.42 \times 10^5</math></b> | HPV10: $8.97 \times 10^{-3}$                | HPV65                           |

<sup>a</sup> Viral loads of causative HPV types are indicated in bold; F, female; M, male; R, right; L, left; VL, viral load; WD, common wart without determined causative HPV type.

Table S1. Cont.

| Sample no. | Patient no. | Patient sex | Patient age (year) | Wart location | Wart duration (month) | Wart diameter (mm) | HPV2 VL (copies/cell)        | HPV27 VL (copies/cell)       | HPV57 VL (copies/cell)       | HPV4 VL (copies/cell)        | HPV65 VL (copies/cell)       | Other HPV VL (copies/cell)                                        | Causative HPV type <sup>a</sup> |
|------------|-------------|-------------|--------------------|---------------|-----------------------|--------------------|------------------------------|------------------------------|------------------------------|------------------------------|------------------------------|-------------------------------------------------------------------|---------------------------------|
| 22         | 18b         | F           | 78                 | R hand        | 2                     | 11                 | -                            | -                            | -                            | -                            | <b>1.08 × 10<sup>5</sup></b> | HPV1: 6.05 × 10 <sup>-2</sup> ;<br>HPV10: 9.48 × 10 <sup>-3</sup> | HPV65                           |
| 23         | 19          | M           | 70                 | R hand        | 10                    | 6                  | -                            | -                            | -                            | -                            | <b>6.75 × 10<sup>5</sup></b> | -                                                                 | HPV65                           |
| 24         | 20a         | M           | 17                 | head          | 6                     | 3                  | -                            | -                            | <b>3.11 × 10<sup>3</sup></b> | -                            | -                            | -                                                                 | HPV57                           |
| 25         | 20b         | M           | 17                 | R hand        | 18                    | 3                  | -                            | -                            | <b>1.32 × 10<sup>4</sup></b> | -                            | -                            | -                                                                 | HPV57                           |
| 26         | 21          | M           | 28                 | L hand        | 24                    | 5                  | -                            | -                            | <b>4.33 × 10<sup>3</sup></b> | -                            | -                            | -                                                                 | HPV57                           |
| 27         | 22          | M           | 16                 | L arm         | 3                     | 3                  | <b>8.56 × 10<sup>1</sup></b> | 1.14 × 10 <sup>-1</sup>      | -                            | -                            | -                            | HPV1: 6.30 × 10 <sup>-3</sup>                                     | HPV2                            |
| 28         | 23          | M           | 54                 | R hand        | 18                    | 6                  | -                            | <b>1.85 × 10<sup>0</sup></b> | -                            | -                            | 2.39 × 10 <sup>-2</sup>      | -                                                                 | HPV27                           |
| 29         | 24          | F           | 50                 | R leg         | 6                     | 7                  | -                            | -                            | -                            | -                            | 8.65 × 10 <sup>-5</sup>      | -                                                                 | WD                              |
| 30         | 25          | F           | 54                 | L arm         | 36                    | 7                  | -                            | -                            | -                            | -                            | 2.23 × 10 <sup>-3</sup>      | HPV3: <b>2.17 × 10<sup>4</sup></b>                                | HPV3                            |
| 31         | 26          | F           | 29                 | L hand        | 36                    | 20                 | -                            | -                            | -                            | -                            | -                            | HPV29: <b>1.02 × 10<sup>4</sup></b>                               | HPV29                           |
| 32         | 27          | F           | 46                 | L leg         | 72                    | 10                 | -                            | <b>3.24 × 10<sup>4</sup></b> | -                            | -                            | -                            | -                                                                 | HPV27                           |
| 33         | 28          | M           | 29                 | R hand        | 60                    | 3                  | -                            | -                            | <b>5.23 × 10<sup>0</sup></b> | -                            | -                            | -                                                                 | HPV57                           |
| 34         | 29a         | M           | 15                 | R hand        | 36                    | 7                  | -                            | -                            | <b>2.13 × 10<sup>4</sup></b> | -                            | -                            | HPV63: 4.16 × 10 <sup>-4</sup>                                    | HPV57                           |
| 35         | 29b         | M           | 15                 | R hand        | 36                    | 7                  | -                            | -                            | <b>2.33 × 10<sup>4</sup></b> | -                            | -                            | -                                                                 | HPV57                           |
| 36         | 29c         | M           | 15                 | head          | 3                     | 5                  | -                            | -                            | <b>3.03 × 10<sup>3</sup></b> | -                            | -                            | HPV63: 3.42 × 10 <sup>-4</sup>                                    | HPV57                           |
| 37         | 30          | F           | 9                  | L leg         | 12                    | 8                  | -                            | -                            | <b>3.29 × 10<sup>4</sup></b> | -                            | -                            | -                                                                 | HPV57                           |
| 38         | 31          | F           | 20                 | R arm         | 3                     | 9                  | <b>1.34 × 10<sup>4</sup></b> | -                            | -                            | -                            | -                            | HPV1: 1.67 × 10 <sup>-1</sup>                                     | HPV2                            |
| 39         | 32a         | F           | 16                 | R hand        | 48                    | 5                  | -                            | -                            | <b>6.06 × 10<sup>2</sup></b> | -                            | -                            | -                                                                 | HPV57                           |
| 40         | 32b         | F           | 16                 | L hand        | 48                    | 5                  | -                            | -                            | <b>2.30 × 10<sup>4</sup></b> | -                            | -                            | -                                                                 | HPV57                           |
| 41         | 33          | M           | 20                 | R hand        | 12                    | 5                  | -                            | <b>2.45 × 10<sup>4</sup></b> | -                            | 3.25 × 10 <sup>-4</sup>      | -                            | HPV1: 9.77 × 10 <sup>-3</sup>                                     | HPV27                           |
| 42         | 34a         | F           | 49                 | R hand        | 12                    | 6                  | -                            | -                            | -                            | -                            | <b>2.66 × 10<sup>5</sup></b> | -                                                                 | HPV65                           |
| 43         | 34b         | F           | 49                 | R hand        | 12                    | 3                  | -                            | -                            | -                            | -                            | <b>2.03 × 10<sup>5</sup></b> | -                                                                 | HPV65                           |
| 44         | 35a         | M           | 15                 | R hand        | 12                    | 7                  | -                            | -                            | -                            | -                            | <b>1.12 × 10<sup>5</sup></b> | -                                                                 | HPV65                           |
| 45         | 35b         | M           | 15                 | R hand        | 12                    | 3                  | -                            | -                            | -                            | <b>4.45 × 10<sup>3</sup></b> | -                            | -                                                                 | HPV4                            |
| 46         | 35c         | M           | 15                 | L hand        | 24                    | 3                  | -                            | -                            | -                            | <b>1.61 × 10<sup>4</sup></b> | -                            | -                                                                 | HPV4                            |
| 47         | 36a         | F           | 35                 | L hand        | 18                    | 13                 | -                            | 2.84 × 10 <sup>-2</sup>      | <b>2.84 × 10<sup>4</sup></b> | -                            | 4.29 × 10 <sup>-4</sup>      | -                                                                 | HPV57                           |
| 48         | 36b         | F           | 35                 | L hand        | 12                    | 4                  | -                            | -                            | <b>4.87 × 10<sup>3</sup></b> | -                            | 3.13 × 10 <sup>-4</sup>      | -                                                                 | HPV57                           |
| 49         | 37a         | F           | 13                 | L hand        | 48                    | 7                  | -                            | -                            | -                            | <b>1.29 × 10<sup>5</sup></b> | -                            | HPV63: 6.19 × 10 <sup>-4</sup>                                    | HPV4                            |
| 50         | 37b         | F           | 13                 | L hand        | 36                    | 4                  | -                            | -                            | -                            | <b>1.01 × 10<sup>5</sup></b> | -                            | -                                                                 | HPV4                            |

<sup>a</sup> Viral loads of causative HPV types are indicated in bold; F, female; M, male; R, right; L, left; VL, viral load; WD, common wart without determined causative HPV type.

Table S1. Cont.

| Sample no. | Patient no. | Patient sex | Patient age (year) | Wart location | Wart duration (month) | Wart diameter (mm) | HPV2 VL (copies/cell) | HPV27 VL (copies/cell)               | HPV57 VL (copies/cell)               | HPV4 VL (copies/cell)                | HPV65 VL (copies/cell)               | Other HPV VL (copies/cell)  | Causative HPV type <sup>a</sup> |
|------------|-------------|-------------|--------------------|---------------|-----------------------|--------------------|-----------------------|--------------------------------------|--------------------------------------|--------------------------------------|--------------------------------------|-----------------------------|---------------------------------|
| 51         | 37c         | F           | 13                 | R hand        | 24                    | 4                  | -                     | -                                    | -                                    | <b><math>3.25 \times 10^4</math></b> | -                                    | -                           | HPV4                            |
| 52         | 38          | F           | 23                 | R leg         | 18                    | 9                  | -                     | -                                    | <b><math>3.67 \times 10^3</math></b> | -                                    | -                                    | HPV1: $1.30 \times 10^{-1}$ | HPV57                           |
| 53         | 39          | M           | 13                 | head          | 1                     | 3                  | -                     | <b><math>1.45 \times 10^4</math></b> | -                                    | -                                    | -                                    | -                           | HPV27                           |
| 54         | 40          | F           | 51                 | R hand        | 6                     | 7                  | -                     | <b><math>2.00 \times 10^4</math></b> | -                                    | -                                    | -                                    | -                           | HPV27                           |
| 55         | 41          | F           | 17                 | head          | 3                     | 4                  | -                     | -                                    | <b><math>7.17 \times 10^3</math></b> | -                                    | $1.95 \times 10^{-4}$                | -                           | HPV57                           |
| 56         | 42          | M           | 34                 | L leg         | 6                     | 5                  | -                     | -                                    | <b><math>2.18 \times 10^4</math></b> | -                                    | -                                    | HPV1: $3.16 \times 10^{-1}$ | HPV57                           |
| 57         | 43a         | M           | 22                 | R hand        | 18                    | 10                 | -                     | <b><math>5.87 \times 10^2</math></b> | -                                    | -                                    | -                                    | HPV1: $3.61 \times 10^{-2}$ | HPV27                           |
| 58         | 43b         | M           | 22                 | R hand        | 12                    | 3                  | -                     | <b><math>8.01 \times 10^3</math></b> | -                                    | -                                    | -                                    | -                           | HPV27                           |
| 59         | 43c         | M           | 22                 | R hand        | 12                    | 4                  | -                     | <b><math>2.36 \times 10^4</math></b> | -                                    | -                                    | -                                    | -                           | HPV27                           |
| 60         | 44a         | M           | 25                 | L leg         | 3                     | 5                  | -                     | <b><math>9.47 \times 10^3</math></b> | -                                    | -                                    | -                                    | HPV1: $6.73 \times 10^{-2}$ | HPV27                           |
| 61         | 44b         | M           | 25                 | R hand        | 3                     | 7                  | -                     | <b><math>3.78 \times 10^3</math></b> | -                                    | -                                    | -                                    | HPV1: $3.50 \times 10^{-1}$ | HPV27                           |
| 62         | 45a         | F           | 22                 | R arm         | 48                    | 5                  | -                     | -                                    | <b><math>4.97 \times 10^4</math></b> | -                                    | -                                    | -                           | HPV57                           |
| 63         | 45b         | F           | 22                 | R arm         | 24                    | 4                  | -                     | -                                    | <b><math>1.24 \times 10^4</math></b> | -                                    | -                                    | -                           | HPV57                           |
| 64         | 46a         | F           | 43                 | R hand        | 36                    | 8                  | -                     | <b><math>5.42 \times 10^3</math></b> | -                                    | -                                    | -                                    | -                           | HPV27                           |
| 65         | 46b         | F           | 43                 | R hand        | 6                     | 4                  | -                     | <b><math>4.46 \times 10^4</math></b> | -                                    | -                                    | -                                    | -                           | HPV27                           |
| 66         | 47          | F           | 52                 | arm           | 60                    | 6                  | -                     | -                                    | $2.97 \times 10^{-3}$                | -                                    | <b><math>2.18 \times 10^5</math></b> | -                           | HPV65                           |
| 67         | 48          | M           | 19                 | L arm         | 36                    | 11                 | -                     | <b><math>3.20 \times 10^3</math></b> | -                                    | -                                    | -                                    | -                           | HPV27                           |
| 68         | 49a         | F           | 40                 | hand          | 2                     | 4                  | -                     | -                                    | -                                    | -                                    | <b><math>7.60 \times 10^4</math></b> | -                           | HPV65                           |
| 69         | 49b         | F           | 40                 | hand          | 2                     | 5                  | -                     | -                                    | -                                    | -                                    | <b><math>1.85 \times 10^5</math></b> | -                           | HPV65                           |
| 70         | 50a         | M           | 21                 | L hand        | 12                    | 6                  | -                     | <b><math>1.46 \times 10^4</math></b> | -                                    | -                                    | -                                    | -                           | HPV27                           |
| 71         | 50b         | M           | 21                 | L hand        | 1                     | 8                  | -                     | <b><math>1.00 \times 10^4</math></b> | -                                    | -                                    | $1.11 \times 10^{-2}$                | -                           | HPV27                           |
| 72         | 51a         | M           | 21                 | L hand        | 18                    | 5                  | -                     | -                                    | -                                    | <b><math>2.43 \times 10^4</math></b> | -                                    | -                           | HPV4                            |
| 73         | 51b         | M           | 21                 | L hand        | 18                    | 4                  | -                     | -                                    | -                                    | <b><math>1.13 \times 10^4</math></b> | -                                    | -                           | HPV4                            |
| 74         | 52a         | F           | 25                 | R hand        | 12                    | 2                  | -                     | -                                    | <b><math>8.06 \times 10^1</math></b> | -                                    | -                                    | -                           | HPV57                           |
| 75         | 52b         | F           | 25                 | L hand        | 8                     | 3                  | -                     | -                                    | $1.39 \times 10^{-3}$                | <b><math>2.35 \times 10^4</math></b> | -                                    | -                           | HPV4                            |
| 76         | 53a         | F           | 36                 | R hand        | 12                    | 3                  | -                     | <b><math>1.21 \times 10^3</math></b> | -                                    | -                                    | -                                    | -                           | HPV27                           |
| 77         | 53b         | F           | 36                 | R hand        | 12                    | 4                  | -                     | <b><math>1.23 \times 10^3</math></b> | -                                    | -                                    | -                                    | HPV1: $1.65 \times 10^{-4}$ | HPV27                           |
| 78         | 54          | M           | 62                 | L hand        | 60                    | 6                  | -                     | -                                    | -                                    | $3.23 \times 10^{-3}$                | -                                    | -                           | WD                              |
| 79         | 55          | F           | 20                 | R hand        | 2                     | 3                  | -                     | -                                    | -                                    | <b><math>2.98 \times 10^2</math></b> | -                                    | -                           | HPV4                            |
| 80         | 56          | F           | 69                 | R hand        | 12                    | 4                  | -                     | -                                    | -                                    | -                                    | <b><math>1.53 \times 10^4</math></b> | -                           | HPV65                           |
| 81         | 57          | F           | 13                 | L leg         | 6                     | 3                  | -                     | -                                    | <b><math>1.74 \times 10^2</math></b> | -                                    | -                                    | -                           | HPV57                           |

<sup>a</sup> Viral loads of causative HPV types are indicated in bold; F, female; M, male; R, right; L, left; VL, viral load; WD, common wart without determined causative HPV type.

Table S1. Cont.

| Sample no. | Patient no. | Patient sex | Patient age (year) | Wart location | Wart duration (month) | Wart diameter (mm) | HPV2 VL (copies/cell)                | HPV27 VL (copies/cell)               | HPV57 VL (copies/cell)               | HPV4 VL (copies/cell)                | HPV65 VL (copies/cell) | Other HPV VL (copies/cell)                  | Causative HPV type <sup>a</sup> |
|------------|-------------|-------------|--------------------|---------------|-----------------------|--------------------|--------------------------------------|--------------------------------------|--------------------------------------|--------------------------------------|------------------------|---------------------------------------------|---------------------------------|
| 82         | 58          | M           | 16                 | R arm         | 36                    | 5                  | -                                    | <b><math>6.00 \times 10^3</math></b> | -                                    | -                                    | -                      | -                                           | HPV27                           |
| 83         | 59a         | M           | 10                 | R arm         | 12                    | 4                  | -                                    | <b><math>3.18 \times 10^4</math></b> | -                                    | -                                    | -                      | -                                           | HPV27                           |
| 84         | 59b         | M           | 10                 | R arm         | 12                    | 4                  | -                                    | <b><math>4.77 \times 10^3</math></b> | -                                    | -                                    | -                      | -                                           | HPV27                           |
| 85         | 60          | M           | 14                 | R hand        | 24                    | 4                  | -                                    | <b><math>3.03 \times 10^2</math></b> | -                                    | -                                    | $1.29 \times 10^{-4}$  | -                                           | HPV27                           |
| 86         | 61a         | F           | 36                 | R hand        | 12                    | 6                  | -                                    | <b><math>6.93 \times 10^3</math></b> | -                                    | -                                    | -                      | -                                           | HPV27                           |
| 87         | 61b         | F           | 36                 | R hand        | 12                    | 3                  | -                                    | <b><math>3.32 \times 10^3</math></b> | -                                    | -                                    | -                      | -                                           | HPV27                           |
| 88         | 62          | F           | 63                 | L hand        | 6                     | 6                  | <b><math>5.16 \times 10^3</math></b> | -                                    | -                                    | -                                    | -                      | -                                           | HPV2                            |
| 89         | 63a         | F           | 56                 | R hand        | 12                    | 4                  | -                                    | -                                    | -                                    | <b><math>8.85 \times 10^2</math></b> | -                      | -                                           | HPV4                            |
| 90         | 63b         | F           | 56                 | R hand        | 12                    | 5                  | -                                    | -                                    | -                                    | <b><math>7.16 \times 10^3</math></b> | -                      | -                                           | HPV4                            |
| 91         | 64          | M           | 24                 | L hand        | 3                     | 6                  | <b><math>1.42 \times 10^4</math></b> | -                                    | -                                    | -                                    | -                      | HPV1: $1.31 \times 10^{-4}$                 | HPV2                            |
| 92         | 65          | M           | 63                 | R hand        | 12                    | 8                  | -                                    | <b><math>3.23 \times 10^4</math></b> | -                                    | -                                    | -                      | -                                           | HPV27                           |
| 93         | 66a         | M           | 25                 | R hand        | 6                     | 4                  | -                                    | $5.82 \times 10^{-2}$                | -                                    | <b><math>6.40 \times 10^4</math></b> | -                      | -                                           | HPV4                            |
| 94         | 66b         | M           | 25                 | R hand        | 6                     | 4                  | $4.35 \times 10^{-2}$                | -                                    | -                                    | <b><math>5.65 \times 10^5</math></b> | -                      | -                                           | HPV4                            |
| 95         | 66c         | M           | 25                 | R hand        | 6                     | 4                  | -                                    | -                                    | -                                    | <b><math>4.97 \times 10^4</math></b> | -                      | -                                           | HPV4                            |
| 96         | 67          | F           | 42                 | R hand        | 24                    | 5                  | -                                    | $2.48 \times 10^{-2}$                | -                                    | -                                    | -                      | HPV95: <b><math>5.87 \times 10^2</math></b> | HPV95                           |
| 97         | 68a         | F           | 52                 | R hand        | 24                    | 11                 | -                                    | -                                    | <b><math>3.35 \times 10^4</math></b> | -                                    | -                      | -                                           | HPV57                           |
| 98         | 68b         | F           | 52                 | R hand        | 24                    | 5                  | -                                    | -                                    | <b><math>8.65 \times 10^3</math></b> | -                                    | -                      | -                                           | HPV57                           |
| 99         | 69          | M           | 54                 | L hand        | 12                    | 10                 | -                                    | -                                    | <b><math>2.73 \times 10^4</math></b> | -                                    | -                      | -                                           | HPV57                           |
| 100        | 70          | F           | 72                 | R hand        | 12                    | 4                  | -                                    | -                                    | -                                    | <b><math>8.49 \times 10^4</math></b> | -                      | -                                           | HPV4                            |
| 101        | 71          | M           | 20                 | L leg         | 3                     | 8                  | -                                    | -                                    | <b><math>1.70 \times 10^4</math></b> | -                                    | -                      | -                                           | HPV57                           |
| 102        | 72          | F           | 34                 | R hand        | 1                     | 3                  | -                                    | -                                    | -                                    | <b><math>5.48 \times 10^4</math></b> | -                      | -                                           | HPV4                            |
| 103        | 73          | F           | 45                 | L hand        | 3                     | 6                  | -                                    | -                                    | -                                    | -                                    | -                      | HPV1: <b><math>2.53 \times 10^4</math></b>  | HPV1                            |
| 104        | 74          | F           | 32                 | R hand        | 5                     | 6                  | -                                    | <b><math>5.16 \times 10^3</math></b> | -                                    | -                                    | -                      | -                                           | HPV27                           |
| 105        | 75          | F           | 74                 | R hand        | 24                    | 8                  | <b><math>1.12 \times 10^0</math></b> | -                                    | -                                    | -                                    | -                      | -                                           | HPV2                            |
| 106        | 76          | M           | 21                 | R hand        | 4                     | 6                  | -                                    | <b><math>5.19 \times 10^3</math></b> | -                                    | -                                    | -                      | -                                           | HPV27                           |
| 107        | 77          | F           | 36                 | L hand        | 120                   | 5                  | -                                    | -                                    | -                                    | -                                    | -                      | -                                           | WD                              |
| 108        | 78a         | M           | 26                 | R hand        | 24                    | 6                  | -                                    | <b><math>2.48 \times 10^4</math></b> | -                                    | $1.27 \times 10^{-4}$                | -                      | -                                           | HPV27                           |
| 109        | 78b         | M           | 26                 | L hand        | 12                    | 4                  | -                                    | <b><math>6.33 \times 10^3</math></b> | -                                    | -                                    | -                      | -                                           | HPV27                           |
| 110        | 79          | M           | 48                 | R leg         | 12                    | 5                  | -                                    | -                                    | -                                    | -                                    | -                      | -                                           | WD                              |
| 111        | 80a         | M           | 36                 | R hand        | 36                    | 12                 | <b><math>6.73 \times 10^3</math></b> | -                                    | -                                    | -                                    | -                      | -                                           | HPV2                            |
| 112        | 80b         | M           | 36                 | R hand        | 12                    | 5                  | <b><math>1.31 \times 10^3</math></b> | -                                    | -                                    | -                                    | -                      | -                                           | HPV2                            |

<sup>a</sup> Viral loads of causative HPV types are indicated in bold; F, female; M, male; R, right; L, left; VL, viral load; WD, common wart without determined causative HPV type.

Table S1. Cont.

| Sample no. | Patient no. | Patient sex | Patient age (year) | Wart location | Wart duration (month) | Wart diameter (mm) | HPV2 VL (copies/cell)                | HPV27 VL (copies/cell)               | HPV57 VL (copies/cell)               | HPV4 VL (copies/cell) | HPV65 VL (copies/cell) | Other HPV VL (copies/cell)                                    | Causative HPV type <sup>a</sup> |
|------------|-------------|-------------|--------------------|---------------|-----------------------|--------------------|--------------------------------------|--------------------------------------|--------------------------------------|-----------------------|------------------------|---------------------------------------------------------------|---------------------------------|
| 113        | 81a         | F           | 23                 | R hand        | 2                     | 10                 | <b><math>5.45 \times 10^5</math></b> | -                                    | -                                    | -                     | -                      | -                                                             | HPV2                            |
| 114        | 81b         | F           | 23                 | L arm         | 2                     | 10                 | <b><math>2.46 \times 10^3</math></b> | -                                    | $9.52 \times 10^{-3}$                | -                     | -                      | -                                                             | HPV2                            |
| 115        | 82a         | M           | 27                 | R hand        | 12                    | 5                  | -                                    | -                                    | -                                    | -                     | -                      | HPV28: <b><math>2.14 \times 10^5</math></b>                   | HPV28                           |
| 116        | 82b         | M           | 27                 | R hand        | 12                    | 10                 | -                                    | -                                    | -                                    | -                     | -                      | HPV28: <b><math>6.21 \times 10^5</math></b>                   | HPV28                           |
| 117        | 83a         | F           | 15                 | L hand        | 6                     | 7                  | -                                    | -                                    | <b><math>4.93 \times 10^4</math></b> | -                     | -                      | -                                                             | HPV57                           |
| 118        | 83b         | F           | 15                 | L arm         | 6                     | 3                  | -                                    | $5.01 \times 10^{-4}$                | <b><math>2.13 \times 10^2</math></b> | -                     | -                      | -                                                             | HPV57                           |
| 119        | 84          | F           | 22                 | L hand        | 2                     | 2                  | -                                    | <b><math>7.46 \times 10^3</math></b> | -                                    | -                     | -                      | -                                                             | HPV27                           |
| 120        | 85          | M           | 31                 | R hand        | 12                    | 10                 | -                                    | <b><math>2.25 \times 10^4</math></b> | -                                    | -                     | -                      | -                                                             | HPV27                           |
| 121        | 86a         | F           | 49                 | L hand        | 120                   | 6                  | -                                    | -                                    | <b><math>7.38 \times 10^3</math></b> | -                     | -                      | -                                                             | HPV57                           |
| 122        | 86b         | F           | 49                 | L hand        | 60                    | 13                 | -                                    | -                                    | <b><math>3.03 \times 10^3</math></b> | -                     | -                      | -                                                             | HPV57                           |
| 123        | 87a         | M           | 41                 | R hand        | 6                     | 7                  | <b><math>2.29 \times 10^3</math></b> | -                                    | $6.38 \times 10^{-4}$                | -                     | -                      | -                                                             | HPV2                            |
| 124        | 87b         | M           | 41                 | R hand        | 5                     | 4                  | <b><math>2.59 \times 10^1</math></b> | -                                    | $5.04 \times 10^{-2}$                | -                     | -                      | -                                                             | HPV2                            |
| 125        | 88          | M           | 59                 | R hand        | 120                   | 12                 | -                                    | $8.13 \times 10^{-3}$                | -                                    | -                     | -                      | HPV1: $7.61 \times 10^{-2}$                                   | WD                              |
| 126        | 89a         | M           | 41                 | R hand        | 24                    | 7                  | -                                    | -                                    | -                                    | -                     | -                      | HPV10: <b><math>1.01 \times 10^3</math></b>                   | HPV10                           |
| 127        | 89b         | M           | 41                 | R hand        | 6                     | 5                  | -                                    | -                                    | -                                    | -                     | -                      | HPV1: $1.12 \times 10^{-3}$ ;<br>HPV10: $1.09 \times 10^{-1}$ | WD                              |
| 128        | 90          | F           | 25                 | R hand        | 8                     | 3                  | <b><math>1.86 \times 10^1</math></b> | -                                    | -                                    | -                     | -                      | -                                                             | HPV2                            |

<sup>a</sup> Viral loads of causative HPV types are indicated in bold; F, female; M, male; R, right; L, left; VL, viral load; WD, common wart without determined causative HPV type.

**Table S2:** Etiological characterization of nine common wart samples in which human papillomavirus (HPV) DNA was not detected in our previous study [15].

| Sample no. | Sample code [15] | Viral load (viral copies/cell)       |                                      | Causative HPV type <sup>a</sup> |
|------------|------------------|--------------------------------------|--------------------------------------|---------------------------------|
|            |                  | HPV4                                 | HPV65                                |                                 |
| 1          | CW148A           | -                                    | <b><math>1.58 \times 10^5</math></b> | HPV65                           |
| 2          | CW189B           | <b><math>5.37 \times 10^5</math></b> | -                                    | HPV4                            |
| 3          | CW189C           | $8.03 \times 10^{-1}$                | -                                    | WD                              |
| 4          | CW201A           | -                                    | <b><math>2.87 \times 10^4</math></b> | HPV65                           |
| 5          | CW235            | -                                    | $1.70 \times 10^{-4}$                | WD                              |
| 6          | CW253B           | -                                    | <b><math>2.54 \times 10^5</math></b> | HPV65                           |
| 7          | CW255A           | <b><math>1.98 \times 10^5</math></b> | -                                    | HPV4                            |
| 8          | CW255B           | <b><math>2.64 \times 10^3</math></b> | -                                    | HPV4                            |
| 9          | CW255C           | <b><math>8.82 \times 10^3</math></b> | -                                    | HPV4                            |

<sup>a</sup> Viral loads of causative HPV types are indicated in bold; WD, common wart without determined causative HPV type.

**Table S3:** Etiological characterization of 25 common wart samples in which the causative human papillomavirus (HPV) types could not be reliably determined in our previous study [15].

| Sample no. | Sample code [15] | Viral load (viral copies/cell) - previously estimated [15] |                      |                      |                      |                      | Viral load (viral copies/cell) - estimated in this study |                                      |                                      |                                      |                                      | Causative HPV type <sup>a</sup> |
|------------|------------------|------------------------------------------------------------|----------------------|----------------------|----------------------|----------------------|----------------------------------------------------------|--------------------------------------|--------------------------------------|--------------------------------------|--------------------------------------|---------------------------------|
|            |                  | HPV2                                                       | HPV27                | HPV57                | HPV1                 | HPV63                | HPV4                                                     | HPV65                                | HPV7                                 | HPV10                                | HPV29                                |                                 |
| 1          | CW040B           | -                                                          | -                    | -                    | $2.6 \times 10^{-2}$ | -                    | -                                                        | $1.44 \times 10^{-4}$                | -                                    | -                                    | -                                    | WD                              |
| 2          | CW078C           | -                                                          | $3.8 \times 10^{-3}$ | -                    | $2.1 \times 10^{-3}$ | -                    | <b><math>5.12 \times 10^4</math></b>                     | -                                    | -                                    | -                                    | -                                    | HPV4                            |
| 3          | CW083A           | -                                                          | $1.0 \times 10^{-1}$ | -                    | $6.1 \times 10^{-3}$ | -                    | -                                                        | -                                    | -                                    | -                                    | -                                    | WD                              |
| 4          | CW094C           | -                                                          | $2.6 \times 10^{-3}$ | $6.0 \times 10^{-4}$ | -                    | -                    | <b><math>4.58 \times 10^4</math></b>                     | -                                    | -                                    | -                                    | -                                    | HPV4                            |
| 5          | CW114A           | $2.5 \times 10^{-3}$                                       | -                    | -                    | -                    | -                    | <b><math>1.10 \times 10^2</math></b>                     | -                                    | -                                    | -                                    | -                                    | HPV4                            |
| 6          | CW117            | -                                                          | -                    | -                    | $4.9 \times 10^{-2}$ | -                    | -                                                        | -                                    | <b><math>9.87 \times 10^3</math></b> | -                                    | -                                    | HPV7                            |
| 7          | CW141A           | -                                                          | -                    | $1.0 \times 10^{-3}$ | -                    | -                    | <b><math>3.98 \times 10^5</math></b>                     | -                                    | -                                    | -                                    | -                                    | HPV4                            |
| 8          | CW141B           | -                                                          | -                    | -                    | -                    | $1.5 \times 10^{-3}$ | <b><math>2.40 \times 10^4</math></b>                     | -                                    | -                                    | -                                    | -                                    | HPV4                            |
| 9          | CW171B           | -                                                          | -                    | $1.9 \times 10^{-3}$ | -                    | -                    | -                                                        | -                                    | <b><math>1.20 \times 10^1</math></b> | -                                    | -                                    | HPV7                            |
| 10         | CW189A           | -                                                          | -                    | $7.0 \times 10^{-4}$ | $3.0 \times 10^{-3}$ | -                    | <b><math>6.79 \times 10^4</math></b>                     | -                                    | -                                    | -                                    | -                                    | HPV4                            |
| 11         | CW201B           | -                                                          | -                    | -                    | -                    | $1.1 \times 10^{-3}$ | -                                                        | <b><math>1.36 \times 10^5</math></b> | -                                    | -                                    | -                                    | HPV65                           |
| 12         | CW201C           | -                                                          | -                    | -                    | $5.7 \times 10^{-3}$ | $2.1 \times 10^{-3}$ | -                                                        | <b><math>1.07 \times 10^5</math></b> | -                                    | $4.10 \times 10^{-3}$                | -                                    | HPV65                           |
| 13         | CW206            | -                                                          | -                    | -                    | $4.6 \times 10^{-3}$ | -                    | -                                                        | -                                    | <b><math>1.64 \times 10^4</math></b> | -                                    | -                                    | HPV7                            |
| 14         | CW207A           | -                                                          | -                    | $7.0 \times 10^{-4}$ | -                    | -                    | -                                                        | $2.59 \times 10^{-4}$                | -                                    | -                                    | -                                    | WD                              |
| 15         | CW209A           | -                                                          | -                    | -                    | $2.1 \times 10^{-2}$ | -                    | $2.27 \times 10^{-3}$                                    | -                                    | -                                    | -                                    | -                                    | WD                              |
| 16         | CW215A           | -                                                          | -                    | $6.0 \times 10^{-4}$ | -                    | -                    | -                                                        | $1.79 \times 10^{-4}$                | -                                    | -                                    | -                                    | WD                              |
| 17         | CW223B           | -                                                          | -                    | -                    | $2.5 \times 10^{-2}$ | -                    | -                                                        | <b><math>1.55 \times 10^5</math></b> | -                                    | $1.35 \times 10^{-2}$                | -                                    | HPV65                           |
| 18         | CW223C           | -                                                          | -                    | -                    | $3.3 \times 10^{-3}$ | -                    | -                                                        | -                                    | -                                    | <b><math>1.65 \times 10^2</math></b> | -                                    | HPV10                           |
| 19         | CW239A           | -                                                          | -                    | -                    | $1.7 \times 10^{-3}$ | -                    | -                                                        | -                                    | -                                    | -                                    | <b><math>1.15 \times 10^4</math></b> | HPV29                           |
| 20         | CW253A           | -                                                          | -                    | -                    | $8.2 \times 10^{-3}$ | -                    | -                                                        | <b><math>4.65 \times 10^5</math></b> | -                                    | -                                    | -                                    | HPV65                           |
| 21         | CW254A           | -                                                          | -                    | -                    | $5.0 \times 10^{-4}$ | -                    | -                                                        | $9.79 \times 10^{-5}$                | -                                    | -                                    | -                                    | WD                              |
| 22         | CW260A           | -                                                          | -                    | -                    | $1.6 \times 10^{-2}$ | $6.6 \times 10^{-3}$ | <b><math>1.60 \times 10^5</math></b>                     | -                                    | -                                    | -                                    | -                                    | HPV4                            |
| 23         | CW260B           | -                                                          | -                    | -                    | $1.4 \times 10^{-1}$ | $1.1 \times 10^{-2}$ | <b><math>6.57 \times 10^4</math></b>                     | -                                    | -                                    | -                                    | -                                    | HPV4                            |
| 24         | CW260C           | -                                                          | -                    | -                    | $6.8 \times 10^{-3}$ | -                    | <b><math>1.08 \times 10^5</math></b>                     | -                                    | -                                    | -                                    | -                                    | HPV4                            |
| 25         | CW276            | -                                                          | -                    | -                    | -                    | $1.8 \times 10^{-2}$ | -                                                        | -                                    | -                                    | -                                    | -                                    | WD                              |

<sup>a</sup> Viral loads of causative HPV types are indicated in bold; WD, common wart without determined causative HPV type.
